# Supplementary material for: Spontaneous retrotranspositions in normal tissues are rare and associated with cell-type-specific differentiation
Source: bioRxiv or medRxiv preprint supplement (doi:10.1101/536896), 2019-01-31
Supplement: Supplementary file [file media-2.pdf]

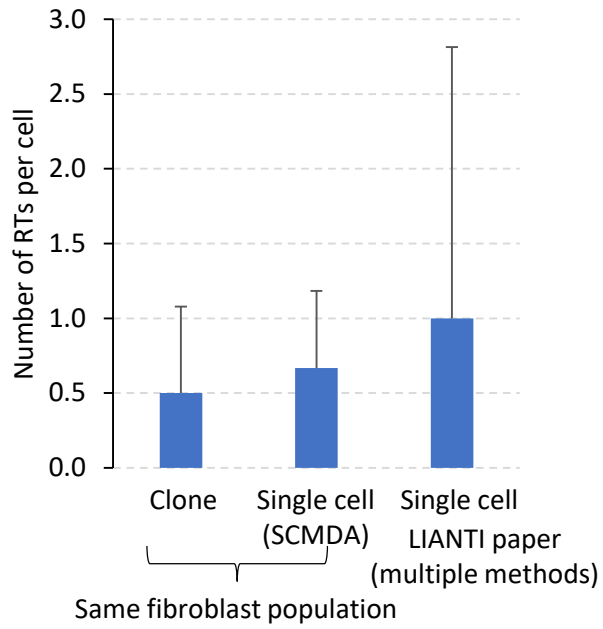

**Fig. S1.**

**a.**

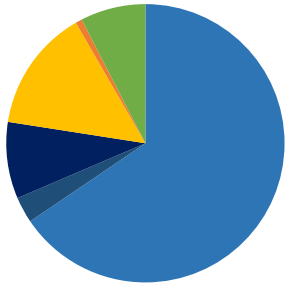

■ L1 - td0 ■ L1 - td1 ■ L1 - td2  
■ Alu ■ ERVK ■ Other

**b.**

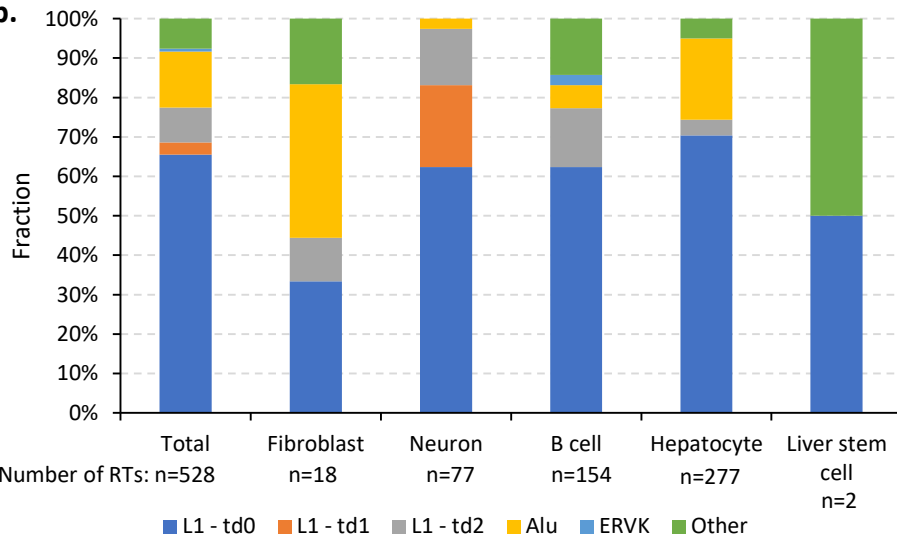

**Fig. S2.**

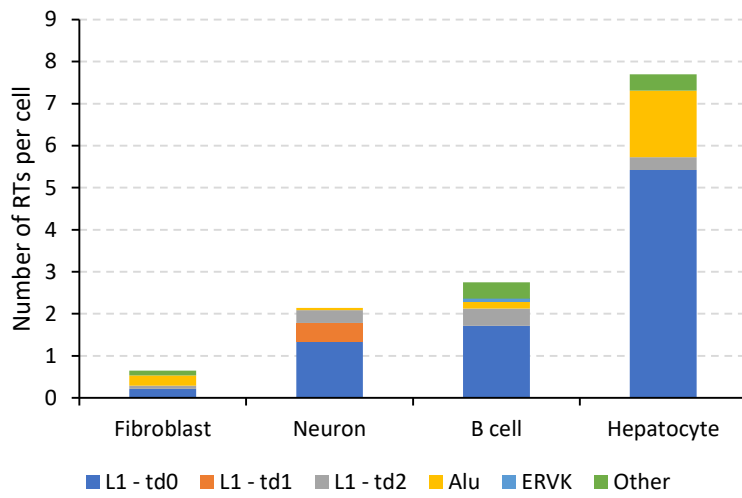

**Fig. S3.**

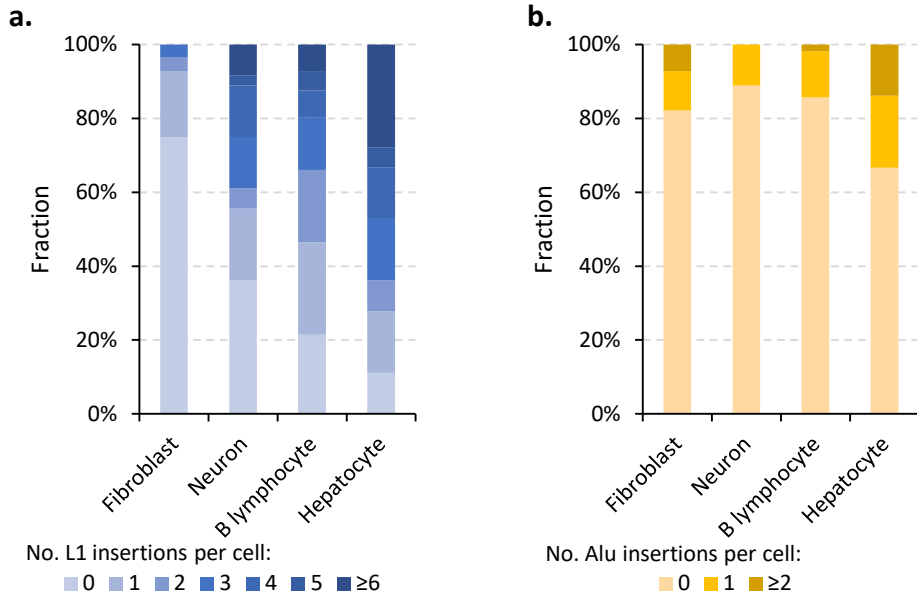

**Fig. S4.**

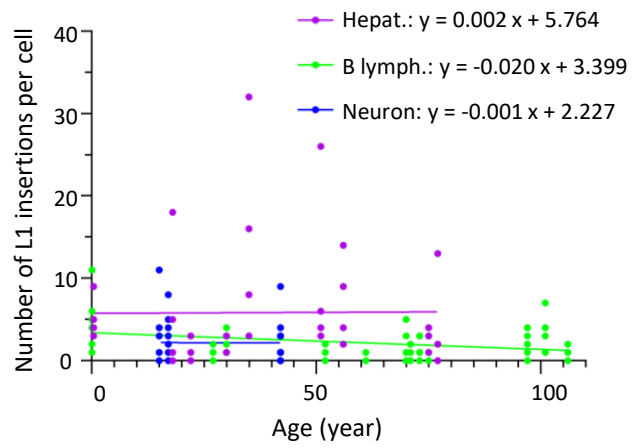

**Fig. S5.**

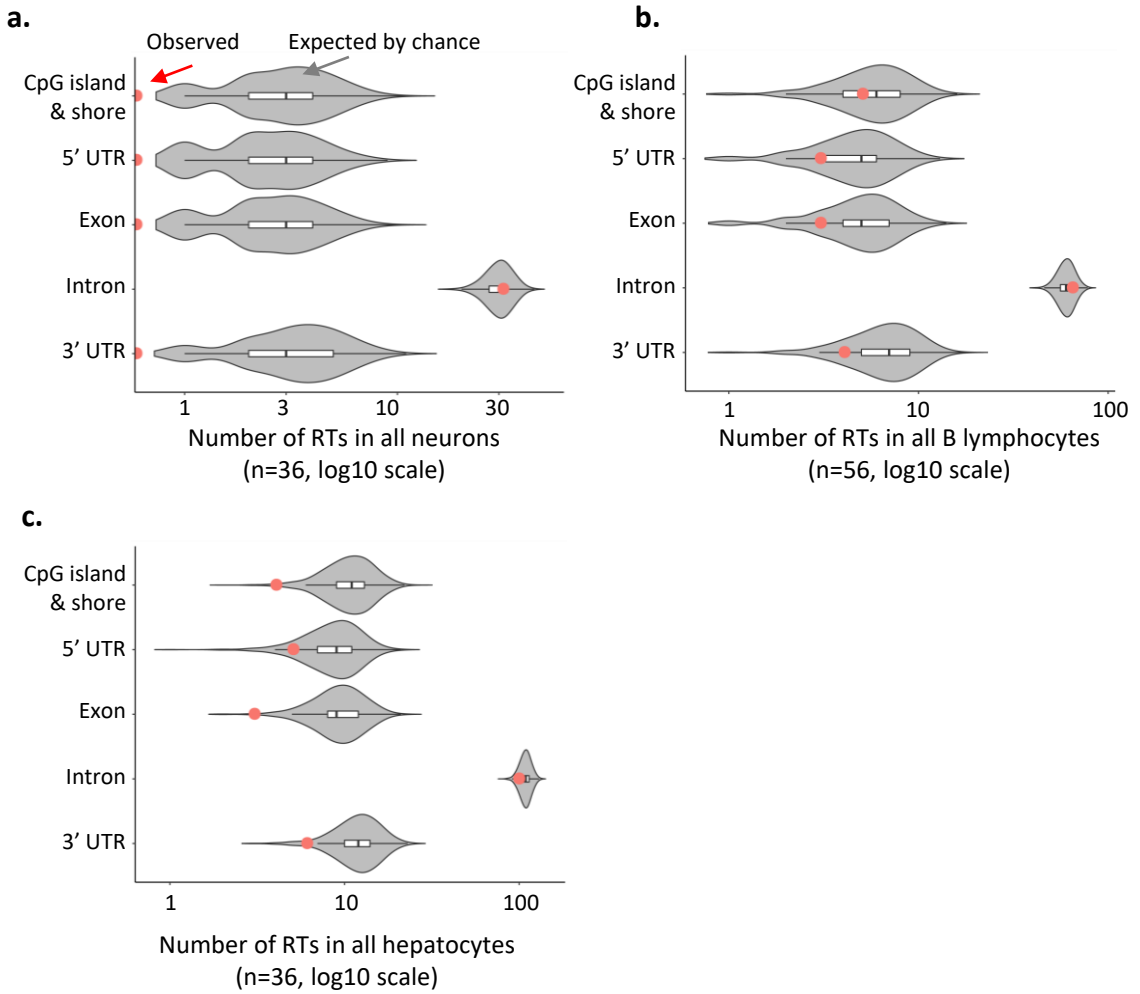

**Fig. S6.**

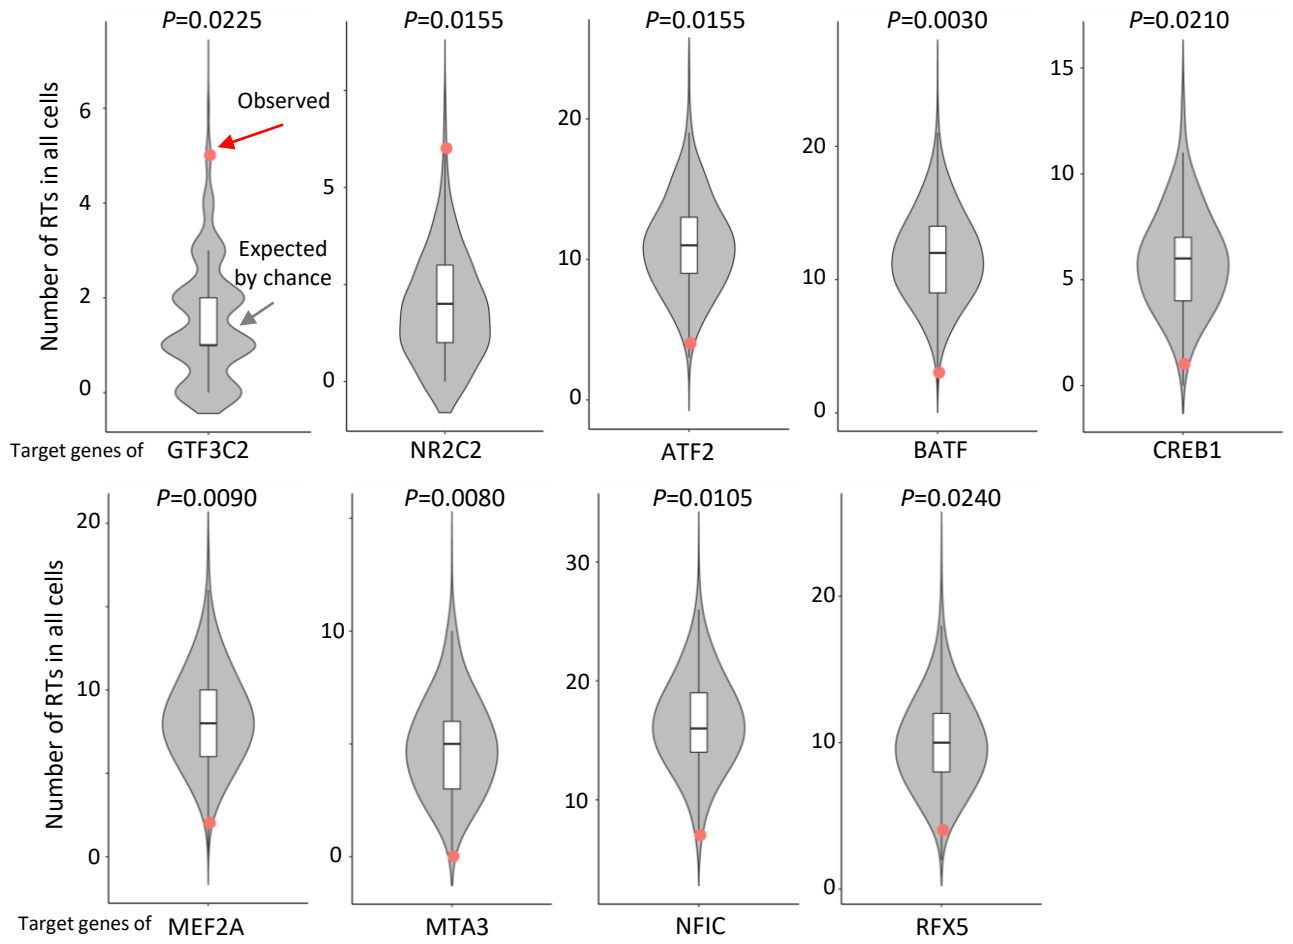

**Fig. S7.**

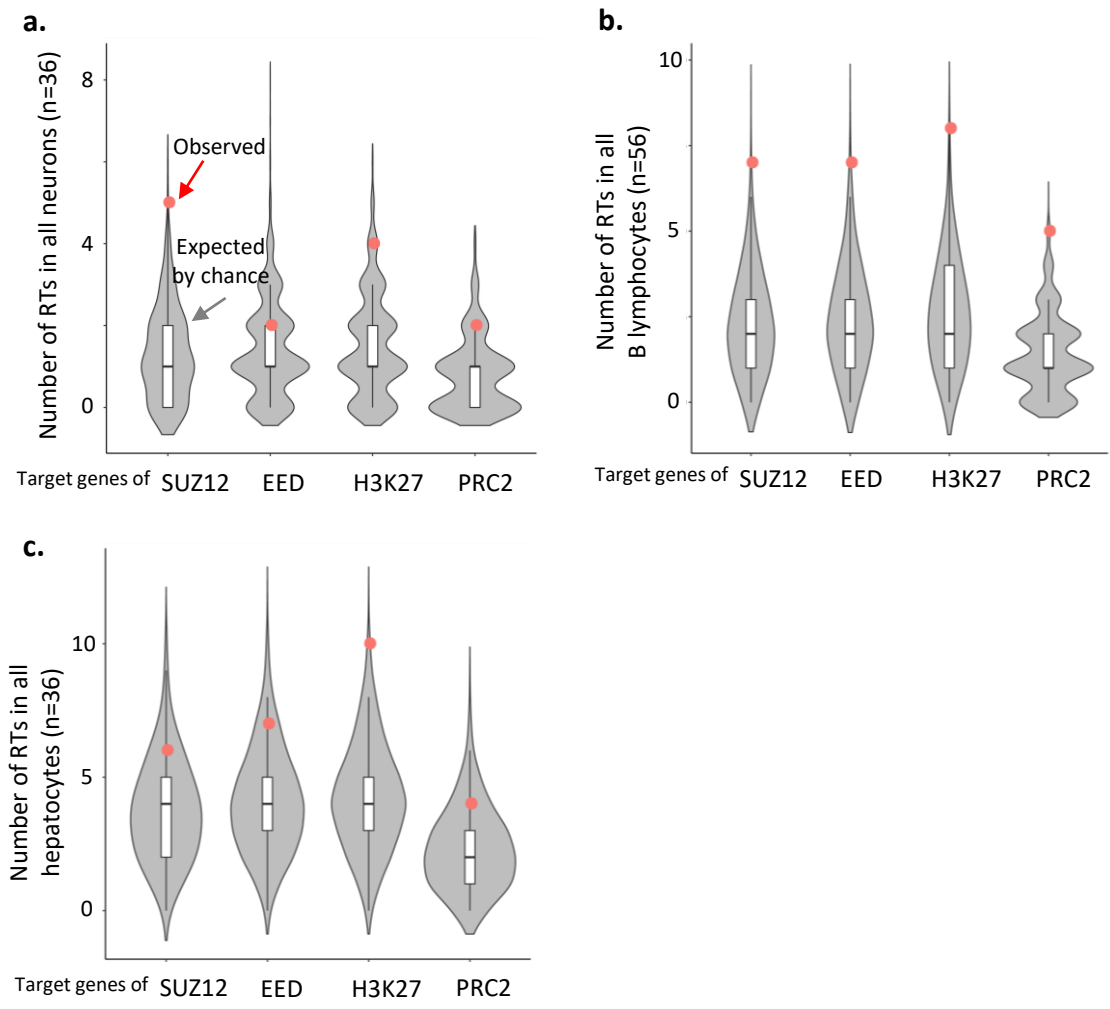

**Fig. S8.**



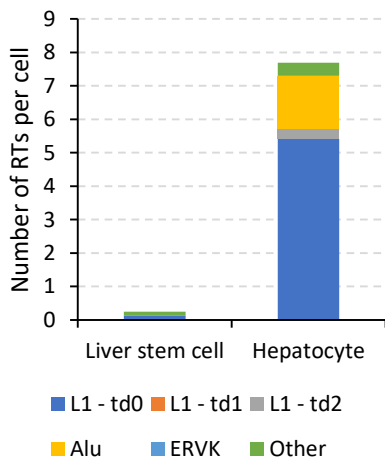

**Fig. S9.**
